# Supplementary material for: Effect of phenolic extracts from different extra-virgin olive oil varieties on osteoblast-like cells
Source: PubMed Central journal article supplement (PMC5919649; doi:10.1371/journal.pone.0196530), 2018-04-26
Supplement: pone.0196530.s001.pdf [file pone.0196530.s001.pdf]

**S1 Table. Data for alkaline phosphatase activity, Fig 1.** Relation between ALP/Proteins after treatment with phenolic extracts using Bradford's method.

|                                    | <b>ALP</b> | <b>PROTEINS</b> | <b>ALP/PROTEINS</b> |
|------------------------------------|------------|-----------------|---------------------|
| <b>Control</b>                     | 0,0633     | 0,555622129     | 0,113898403         |
| <b>Control</b>                     | 0,0808     | 0,738366287     | 0,109483752         |
| <b>Control</b>                     | 0,0826     | 0,757339724     | 0,109058819         |
| <b>Picual 10<sup>-6</sup>M</b>     | 0,2845     | 0,831236269     | 0,342228717         |
| <b>Picual 10<sup>-6</sup>M</b>     | 0,3222     | 0,721390054     | 0,446659049         |
| <b>Picual 10<sup>-6</sup>M</b>     | 0,2704     | 0,768324346     | 0,351972721         |
| <b>Hojiblanca 10<sup>-6</sup>M</b> | 0,1230     | 0,847213901     | 0,145146633         |
| <b>Hojiblanca 10<sup>-6</sup>M</b> | 0,2116     | 0,735370481     | 0,287774906         |
| <b>Hojiblanca 10<sup>-6</sup>M</b> | 0,1835     | 0,784301977     | 0,234009035         |
| <b>Picudo 10<sup>-6</sup>M</b>     | 0,1493     | 0,736369083     | 0,202754579         |
| <b>Picudo 10<sup>-6</sup>M</b>     | 0,1195     | 0,720391452     | 0,165825562         |
| <b>Picudo 10<sup>-6</sup>M</b>     | 0,2230     | 0,545636109     | 0,408755363         |
| <b>Arbequina 10<sup>-6</sup>M</b>  | 0,2064     | 0,536648692     | 0,38452489          |
| <b>Arbequina 10<sup>-6</sup>M</b>  | 0,1853     | 0,561613741     | 0,329922862         |
| <b>Arbequina 10<sup>-6</sup>M</b>  | 0,1967     | 0,560615139     | 0,350864103         |
