# Supplementary material for: Effect of phenolic extracts from different extra-virgin olive oil varieties on osteoblast-like cells
Source: PubMed Central journal article supplement (PMC5919649; doi:10.1371/journal.pone.0196530), 2018-04-26
Supplement: pone.0196530.s002.pdf [file pone.0196530.s002.pdf]

**S2 Table. Data for alkaline phosphatase activity, Fig 1.** Mean, Standard deviation and p value information after treatment with phenolic extracts vs control.

|                                    | <b>Mean</b> | <b>Standard deviation</b> | <b>p value</b> |
|------------------------------------|-------------|---------------------------|----------------|
| <b>Control</b>                     | 0,110       | 0,002                     | -              |
| <b>Picual 10<sup>-6</sup>M</b>     | 0,380       | 0,057                     | 0.015          |
| <b>Hojiblanca 10<sup>-6</sup>M</b> | 0,255       | 0,028                     | 0.012          |
| <b>Picudo 10<sup>-6</sup>M</b>     | 0,322       | 0,075                     | 0.04           |
| <b>Arbequina 10<sup>-6</sup>M</b>  | 0.355       | 0.027                     | 0.000          |
