# Supplementary material for: Effect of phenolic extracts from different extra-virgin olive oil varieties on osteoblast-like cells
Source: PubMed Central journal article supplement (PMC5919649; doi:10.1371/journal.pone.0196530), 2018-04-26
Supplement: pone.0196530.s003.pdf [file pone.0196530.s003.pdf]

**S3 Table. Data for phenotype and phagocytosis, Figs 2 and 3.** Percentage expression of antigens CD54, CD80, CD86 and HLA-DR and phagocytosis after treatment with olive oil phenolic extracts.

|                                    | <b>CD54</b>  | <b>CD80</b>  | <b>CD86</b>  | <b>HLA-DR</b> | <b>Latex</b> |
|------------------------------------|--------------|--------------|--------------|---------------|--------------|
| <b>Control</b>                     | 75,7         | 21,6         | 13           | 5,1           | 98           |
| <b>Control</b>                     | 74,6         | 19,7         | 13,6         | 4,9           | 82,7         |
| <b>Control</b>                     | 75,4         | 18,3         | 13,3         | 5,2           | 98,8         |
| <b>Mean</b>                        | <b>75,23</b> | <b>19,87</b> | <b>13,30</b> | <b>5,07</b>   | <b>93,17</b> |
| <b>Picual 10<sup>-6</sup>M</b>     | 61,9         | 4            | 9,7          | 2,4           | 35,6         |
| <b>Picual 10<sup>-6</sup>M</b>     | 61           | 5,2          | 11,9         | 2,4           | 35,4         |
| <b>Picual 10<sup>-6</sup>M</b>     | 62,9         | 4,4          | 10,6         | 3,5           | 32,8         |
| <b>Mean</b>                        | <b>61,93</b> | <b>4,53</b>  | <b>10,73</b> | <b>2,77</b>   | <b>34,60</b> |
| <b>Hojiblanca 10<sup>-6</sup>M</b> | 57,8         | 8,1          | 13,9         | 4,6           | 45,2         |
| <b>Hojiblanca 10<sup>-6</sup>M</b> | 56,3         | 9            | 14,6         | 4,4           | 44,3         |
| <b>Hojiblanca 10<sup>-6</sup>M</b> | 57,1         | 8,4          | 12,2         | 4,5           | 46,4         |
| <b>Mean</b>                        | <b>57,07</b> | <b>8,50</b>  | <b>13,57</b> | <b>4,50</b>   | <b>45,30</b> |
| <b>Picudo 10<sup>-6</sup>M</b>     | 51,3         | 10,7         | 6,7          | 3,5           | 33,2         |
| <b>Picudo 10<sup>-6</sup>M</b>     | 47,3         | 12,6         | 7,8          | 4,5           | 37           |
| <b>Picudo 10<sup>-6</sup>M</b>     | 50           | 5,7          | 6,3          | 3,5           | 37,4         |
| <b>Mean</b>                        | <b>49,53</b> | <b>9,67</b>  | <b>6,93</b>  | <b>3,83</b>   | <b>35,87</b> |
| <b>Arbequina 10<sup>-6</sup>M</b>  | 38,8         | 2,9          | 14,3         | 4,4           | 39,4         |
| <b>Arbequina 10<sup>-6</sup>M</b>  | 36,9         | 2,6          | 13,4         | 3,2           | 39,1         |
| <b>Arbequina 10<sup>-6</sup>M</b>  | 36,4         | 2,9          | 12,2         | 3,4           | 39           |
| <b>Mean</b>                        | <b>37,37</b> | <b>2,80</b>  | <b>13,30</b> | <b>3,67</b>   | <b>39,17</b> |
