# Supplementary material for: Effect of phenolic extracts from different extra-virgin olive oil varieties on osteoblast-like cells
Source: PubMed Central journal article supplement (PMC5919649; doi:10.1371/journal.pone.0196530), 2018-04-26
Supplement: pone.0196530.s004.pdf [file pone.0196530.s004.pdf]

**S4 Table. Data for phenotype and phagocytosis, Figs 2 and 3.** Mean, standard deviation and p value information after treatment with phenolic extracts *vs* control.

|                                   | CD54         |         | CD80         |         | CD86         |         | HLA-DR      |         | Latex        |         |
|-----------------------------------|--------------|---------|--------------|---------|--------------|---------|-------------|---------|--------------|---------|
|                                   | Mean sd      | p value | Mean sd      | p value | Mean sd      | p value | Mean sd     | p value | Mean sd      | p value |
| <b>Control</b>                    | 75,23 (0,56) | -       | 19,86 (1,65) |         | 13,30 (0,30) | -       | 5,06 (0,15) | -       | 93,16 (9,07) | -       |
| <b>Picual 10<sup>-6</sup>M</b>    | 61,96 (0,95) | 0,000   | 4,53 (0,61)  | 0,000   | 10,73 (1,10) | 0,048   | 2,76 (0,63) | 0,02    | 34,60 (1,56) | 0,007   |
| <b>Hojiblanca10<sup>-6</sup>M</b> | 57,06 (0,75) | 0,000   | 8,50 (0,45)  | 0,004   | 13,56 (1,23) | 0,73    | 4,50 (0,10) | 0,006   | 45,30 (1,05) | 0,011   |
| <b>Picudo10<sup>-6</sup>M</b>     | 49,53 (2,04) | 0,000   | 9,66 (3,56)  | 0,023   | 6,93 (0,77)  | 0,000   | 3,83 (0,57) | 0,05    | 35,86 (2,31) | 0,006   |
| <b>Arbequina 10<sup>-6</sup>M</b> | 37,36 (1,26) | 0,000   | 2,80 (0,17)  | 0,003   | 12,96 (1,15) | 0,65    | 3,66 (0,64) | 0,021   | 39,16 (0,20) | 0,009   |
